# Experimental Correction of Hypercapnic Intracranial Hypertension

Serge J. Dos, M.D., Gabriel G. Nahas, M.D., E. M. Papper, M.D.

It has long been known that a dilatation of vessels of the brain occurs during asphyxia. It is also well established that an increase in  $\text{CO}_2$  concentration in the blood produces a vasodilatation of the cerebral vessels<sup>1,2</sup> and an increase in blood flow through the brain.<sup>3,4</sup> However, it was not before 1930 that Wolff and Lennox<sup>5</sup> demonstrated the correlation between an increase in the  $\text{CO}_2$  content of the blood and a rise in cerebrospinal fluid (CSF) pressure. Their findings were further substantiated by many workers who studied animals breathing high concentrations of  $\text{CO}_2$ .<sup>6</sup> Draper and Whitehead<sup>7</sup> amplifying an earlier observation by Volhard<sup>8</sup> produced in dogs hypercapnic acidosis by their technique of "diffusion respiration," (called by the present authors "apneic oxygenation"). They noted with Goldensohn<sup>9</sup> a marked and early increase in CSF pressure. Similar observations were made by Small *et al.*<sup>10</sup> who induced respiratory arrest with succinylcholine instead of the overdose of thiopental used by Draper and Whitehead. A rise in CSF pressure was noticeable after 90 seconds when  $\text{PaCO}_2$  had increased by about 8–10 mm. of mercury. After 2 minutes of "apneic oxygenation" the CSF pressure rose an average of 126 per cent. After 9 minutes and 24 seconds it reached an average peak of 375 mm. of water. They further demonstrated that the cardiovascular and respiratory effects of  $\text{CO}_2$  are of little importance in producing changes in CSF pressure, suggesting that increased intracranial pressure could result from clinically undetected hypercapnia.

Received from the Department of Anesthesiology, College of Physicians and Surgeons, Columbia University, New York, New York, and accepted for publication September 11, 1961. Dr. Dos is at present in the Department of Surgery, University of Minnesota Medical School, Minneapolis, Minnesota.

The purpose of the present experiment was to compare the effects of an organic hydrogen ion acceptor of low toxicity, 2-amino-2-hydroxymethyl-1,3-propanediol or tris(hydroxymethyl)aminomethane (THAM) on intracranial hypertension of hypercapnic acidosis with the effects of other agents used to relieve elevated intracranial pressure.

## Materials and Methods

Seventeen adult mongrel dogs weighing 12–18 kg. were used. Ten minutes after subcutaneous injection of atropine sulfate (0.3–0.6 mg.), the dogs were lightly anesthetized with 25 mg./kg. of thiopental given intravenously. Their tracheas were immediately intubated with a cuffed endotracheal tube maintained above the carina and no more barbiturate was administered. Lid areflexia was generally avoided. Respiratory paralysis was induced by 0.5 mg./kg. of succinylcholine administered intravenously and the animals' lungs were ventilated with 100 per cent oxygen by means of a pressure controlled mechanical ventilator. Paralysis was maintained by additional doses of succinylcholine (average total dose of 3 mg./kg.). The ventilator was driven at the rate of 16–18/minute with a ratio of inspiration to expiration of 1:2. The endotracheal tube was also connected through one arm of a three-way stopcock to a Benedict-Roth metabolism apparatus filled with oxygen. CSF pressure was measured via a 20-gauge Quincke-Babcock spinal needle inserted into the cisterna magna and connected by a polyethylene catheter to a P 23 BB Statham pressure transducer, and a Sanborn Twin-Visc recorder. Arterial blood pressure was recorded via a femoral artery polyethylene catheter and a P 23 AA Statham pressure transducer. Intravenous fluid was administered by a catheter introduced into the femoral vein.

TABLE 1. Average Changes in Pressure and Acid-Base Balance in Cerebrospinal Fluid and Arterial Blood of Dogs after Two 30 Minute Periods of Apneic Oxygenation

|              | Pressure          |                             | pH                  |                     | HCO <sub>3</sub> <sup>-</sup> mM./L. |                     | Pco <sub>2</sub> mm. Hg |                        | Urine Output ml. |
|--------------|-------------------|-----------------------------|---------------------|---------------------|--------------------------------------|---------------------|-------------------------|------------------------|------------------|
|              | mm. Hg Blood      | mm. H <sub>2</sub> O C.S.F. | Arterial Blood      | C.S.F.              | Arterial Blood                       | C.S.F.              | Arterial Blood          | C.S.F.                 |                  |
| Control      | 117<br>(100-138)* | 61<br>(40-100)              | 7.60<br>(7.55-7.64) | 7.54<br>(7.48-7.59) | 15.5<br>(13.1-22.1)                  | 19.5<br>(12.9-24.1) | 21.1<br>(14.1-40.4)     | 31.3<br>(25.5-47.7)    | 0                |
| A.O.         | 122<br>(110-138)  | 147<br>(90-184)             | 6.87<br>(6.78-6.92) | 6.93<br>(6.70-7.18) | 26.3<br>(22.1-30.7)                  | 19.9<br>(17.0-24.8) | 157.0<br>(133.4-208.4)  | 117.4<br>(97.1-169.5)  | 4<br>(2-10)      |
| Control      | 123<br>(100-150)  | 12<br>(0-30)                | 7.58<br>(7.55-7.63) | 7.45<br>(7.31-7.58) | 15.6<br>(14.0-20.0)                  | 18.2<br>(15.6-20.4) | 24.3<br>(15.7-34.8)     | 33.4<br>(25.9-34.4)    | 15<br>(6-40)     |
| A.O.+THAM    | 133<br>(105-156)  | 26<br>(0-70)                | 7.60<br>(7.34-7.77) | 7.34<br>(7.21-7.46) | 38.1<br>(32.5-42.6)                  | 17.4<br>(15.6-21.7) | 58.6<br>(46.1-77.7)     | 51.1<br>(43.2-76.2)    | 209<br>(152-250) |
| Control      | 128<br>(90-150)   | 36<br>(25-46)               | 7.60<br>(7.55-7.68) | 7.51<br>(7.45-7.60) | 14.2<br>(10.8-19.1)                  | 20.6<br>(19.0-21.5) | 15.1<br>(11.0-22.3)     | 27.1<br>(20.6-32.7)    | 0                |
| A.O.         | 133<br>(120-150)  | 153<br>(70-206)             | 6.90<br>(6.86-6.94) | 6.80<br>(6.73-6.89) | 28.6<br>(24.4-31.6)                  | 21.1<br>(19.5-24.1) | 150.3<br>(110.7-168.1)  | 143.6<br>(131.8-158.9) | 7<br>(4-10)      |
| Control      | 141<br>(110-170)  | 12<br>(0-20)                | 7.60<br>(7.48-7.67) | 7.35<br>(7.21-7.44) | 17.1<br>(12.2-22.3)                  | 17.3<br>(16.7-17.9) | 19.0<br>(11.6-30.6)     | 34.9<br>(26.4-47.7)    | 15<br>(12-18)    |
| A.O.+THAM-Cl | 131<br>(120-146)  | 102<br>(86-110)             | 7.00<br>(6.95-7.04) | 6.89<br>(6.79-7.03) | 28.3<br>(26.2-32.1)                  | 19.8<br>(17.8-22.3) | 116.7<br>(99.0-148.6)   | 110.3<br>(90.1-135.0)  | 180<br>(150-210) |

\* Range.  
During the second period of A.O. the animals were treated as indicated. Each figure represents the average of 3-4 measurements. Trends reported in the average results (increase or decrease) were present in all individual experiments. C.S.F.: cerebrospinal fluid; A.O.: apneic oxygenation.

urinary catheter was inserted into the bladder which was emptied at the start of the first period of "apneic oxygenation" and urinary output was recorded throughout the experiment.

At regular intervals during each experiment, arterial blood and CSF samples were obtained simultaneously and anaerobically. The volume of CSF withdrawn at any one time was never more than 0.5 cc., and it was immediately replaced by the same amount of normal saline; if the CSF was bloody the experiment was discounted. Blood and CSF pH were determined with a model R Cambridge potentiometer and a Sanz micro glass electrode at 37.5° C. Plasma and CSF CO<sub>2</sub> content were determined on the Kopp-Natelson microgasometer.<sup>11</sup> CO<sub>2</sub> partial pressure and bicarbonate ion concentration were calculated with the Henderson-Hasselbalch equation. All analyses were performed in duplicate.

After one hour of denitrogenation the animal was submitted to two 30 minute periods of apneic oxygenation. Thirty minutes of mechanical ventilation separated the two periods of apneic oxygenation. It was established in three experiments that animals subjected to this procedure presented a similar rise in CSF pressure during both periods of apneic oxygenation. The compound to be tested was given during the second period of apneic oxygenation. Five series of experi-

ments were performed. At 0.3 M solution of THAM\* was given intravenously to the first group of dogs at the rate of 1 ml./kg./minute. The second group received the same amount of THAM titrated to pH 7.40 by the addition of 210 mEq/l. of hydrochloric acid. The third group was treated with 0.6 M D-mannitol administered intravenously at the rate of 1 ml./kg./minute. The osmolarity of this solution is similar to that of the titrated THAM. A similar amount of 0.3 M solution of urea was given to the fourth group. The fifth group of dogs was perfused with 30 per cent urea in 10 per cent invert sugar,† at the rate of 0.3 ml./kg./minute.

### Results (Tables 1 and 2)

In all experiments there was a four to five-fold increase in CSF pressure after the first period of apneic oxygenation. Mean blood pressure rose or remained constant. Arterial blood and CSF pH fell below 7.0, while Pco<sub>2</sub> and HCO<sub>3</sub><sup>-</sup> increased in both media. Urinary output was negligible.

In the animals treated with THAM, CSF pressure remained within normal limits, blood pressure did not change, and arterial blood

\* Talatrol, Abbott Laboratories, North Chicago, Illinois.

† Uververt, Travenol Laboratories, Inc., Morton Grove, Illinois.

TABLE 2. Average Changes in Pressure and Acid-Base Balance in Cerebrospinal Fluid and Arterial Blood of Dogs after Two 30 Minute Periods of Apneic Oxygenation

|                             | Pressure          |                             | pH                  |                     | HCO <sub>3</sub> <sup>-</sup> mM./l. |                     | Pco <sub>2</sub> mm. Hg |                        | Urine Output ml. |
|-----------------------------|-------------------|-----------------------------|---------------------|---------------------|--------------------------------------|---------------------|-------------------------|------------------------|------------------|
|                             | mm. Hg Blood      | mm. H <sub>2</sub> O C.S.F. | Arterial Blood      | C.S.F.              | Arterial Blood                       | C.S.F.              | Arterial Blood          | C.S.F.                 |                  |
| Control                     | 122<br>(104-144)* | 44<br>(16-70)               | 7.50<br>(7.40-7.62) | 7.47<br>(7.38-7.54) | 15.7<br>(11.9-17.4)                  | 20.4<br>(17.7-22.8) | 21.5<br>(11.8-27.0)     | 29.9<br>(21.8-35.3)    | 0                |
| A.O.                        | 150<br>(128-192)  | 277<br>(255-296)            | 6.84<br>(6.78-6.91) | 6.87<br>(6.79-6.94) | 21.7<br>(18.0-23.7)                  | 21.4<br>(18.0-23.0) | 132.5<br>(98.4-158.1)   | 165.6<br>(160.0-167.7) | 5<br>(2-10)      |
| Control                     | 128<br>(96-156)   | 30<br>(10-40)               | 7.39<br>(7.29-7.44) | 7.34<br>(7.29-7.38) | 16.1<br>(13.9-17.7)                  | 18.2<br>(17.2-19.7) | 27.3<br>(20.9-35.0)     | 35.6<br>(31.5-43.2)    | 10<br>(5-16)     |
| A.O. +Mannitol              | 161<br>(124-188)  | 155<br>(116-188)            | 6.73<br>(6.59-6.83) | 6.73<br>(6.57-6.85) | 21.5<br>(20.4-23.7)                  | 18.7<br>(16.8-20.6) | 169.3<br>(141.7-225.6)  | 151.2<br>(121.7-199.8) | 215<br>(150-290) |
| Control                     | 165<br>(160-170)  | 63<br>(30-95)               | 7.43<br>(7.41-7.44) | 7.38<br>(7.35-7.44) | 19.6<br>(17.6-20.6)                  | 20.6<br>(20.4-20.7) | 30.1<br>(26.5-33.1)     | 36.9<br>(32.0-39.4)    | 0                |
| A.O.                        | 180<br>(165-200)  | 190<br>(115-270)            | 6.81<br>(6.76-6.84) | 6.76<br>(6.72-6.80) | 29.3<br>(27.1-31.2)                  | 21.1<br>(20.8-21.5) | 188.2<br>(181.8-194.0)  | 159.2<br>(143.9-169.6) | 11<br>(10-14)    |
| Control                     | 180<br>(175-190)  | 70<br>(55-95)               | 7.36<br>(7.22-7.45) | 7.29<br>(7.18-7.36) | 19.8<br>(17.6-22.3)                  | 18.2<br>(16.8-19.0) | 37.8<br>(26.2-55.8)     | 41.3<br>(33.6-56.0)    | 26<br>(20-34)    |
| A.O. +Urea                  | 190<br>(170-225)  | 357<br>(300-400)            | 6.75<br>(6.66-6.85) | 6.73<br>(6.65-6.81) | 26.8<br>(26.2-27.4)                  | 20.8<br>(19.5-22.5) | 167.0<br>(161.7-242.9)  | 168.3<br>(129.1-198.2) | 63<br>(40-94)    |
| Control                     | 150<br>(145-155)  | 53<br>(40-80)               | 7.39<br>(7.35-7.41) | 7.34<br>(7.21-7.50) | 14.9<br>(12.3-17.6)                  | 18.8<br>(17.4-20.0) | 25.3<br>(20.0-31.4)     | 37.6<br>(27.2-46.2)    | 0                |
| A.O.                        | 190<br>(150-210)  | 247<br>(175-320)            | 6.64<br>(6.54-6.73) | 6.58<br>(6.32-6.74) | 24.9<br>(22.2-26.4)                  | 18.9<br>(17.0-21.8) | 238.2<br>(204.3-268.7)  | 178.2<br>(148.6-220.0) | 10<br>(8-15)     |
| Control                     | 130<br>(120-140)  | 33<br>(15-50)               | 7.40<br>(7.28-7.53) | 7.22<br>(7.20-7.29) | 13.5<br>(11.8-15.5)                  | 16.0<br>(15.0-16.6) | 19.9<br>(19.1-25.4)     | 41.8<br>(33.1-47.4)    | 6<br>(10-16)     |
| A.O. +Urea and invert sugar | 207<br>(170-230)  | 100<br>(65-135)             | 6.64<br>(6.57-6.74) | 6.74<br>(6.63-6.94) | 26.4<br>(23.5-28.4)                  | 21.0<br>(20.4-21.4) | 250.3<br>(212.8-276.1)  | 172.7<br>(105.7-206.6) | 72<br>(15-122)   |

\* Range.

During the second period of A.O. the animals were treated as indicated. Each figure represents the average of 3-4 measurements. Trends reported in the average results (increase or decrease) were present in all individual experiments. C.S.F.: cerebrospinal fluid; A.O.: apneic oxygenation.

pH was maintained within  $\pm 0.1$  pH unit. A rise in Pco<sub>2</sub> was limited by the increase in plasma HCO<sub>3</sub><sup>-</sup>. In the CSF, pH fell by about 0.1 pH unit, bicarbonate fell slightly, and Pco<sub>2</sub> rose. A marked diuresis started 3 to 5 minutes after the onset of apnea and was maintained after restoration of mechanical ventilation and cessation of the infusion of THAM.

The animals treated with buffered THAM and those treated with mannitol presented similar, though not identical, pictures. There was a rise in CSF pressure which was less than in the first apneic control period. This increase in pressure, however, was not as great (102 instead of 155 mm. of mercury) in the dogs treated with titrated THAM, and acid-base relationships in blood and CSF were less altered. During the period of apnea urine output was marked in both series and similar to that of the animals treated with THAM at pH 10.2. The animals treated during apnea with a 0.3 M solution of urea had the highest CSF pressure. They also had hypertension, arrhythmias and hematuria. Urinary output was well below fluid input. The administration of urea-invert sugar was accompanied by a three-

fold increase in CSF pressure instead of a five-fold one as in the control period. Diuresis was marked and comparable to that of the dogs treated with THAM or mannitol, urine output tending to match fluid input.

### Discussion

The present series of experiments confirm the effectiveness of THAM in correcting the acute intracranial hypertension of hypercapnic acidosis.<sup>12, 13</sup> That this correction requires a normal blood pH is borne out by these observations. The administration of THAM titrated to pH 7.40 is accompanied by a rise in CSF pressure. This increase, however, is not as great as the increase with 0.6 M mannitol which completely lacks buffering activity and is accompanied by a greater degree of acidosis. However, the relationship between increase in CSF pressure and acid-base balance changes in blood and CSF cannot be closely analyzed in the present experiments, where the samples of CSF were replaced by normal saline, thus altering the bicarbonate concentration and acid-base balance in this compartment. It can only be pointed out that, in the presence of minimal fluid load, a rise in CSF pressure is

accompanied by a fall in pH and an increase in  $P_{CO_2}$ , both in arterial blood and CSF. As reported previously, there is little correlation between arterial and CSF pressures.<sup>10</sup> It is apparent that THAM acts through both its osmotic and buffering properties, since a THAM solution titrated to pH 7.40 with HCl partially corrects the rise in CSF pressure during apneic oxygenation. When 0.6 M D-mannitol is administered in an amount which will produce a diuresis similar to that of titrated THAM, but not correct the acidosis at all, the rise in CSF pressure is more pronounced. A mixture of urea and dextrose reduces the intracranial pressure to a greater extent than THAM-chloride or mannitol. Two factors may be responsible for this: the much smaller fluid load (0.3 ml./kg./minute instead of 1 ml./kg./minute) and the marked increase in blood osmolality which accompanies the infusion of urea-invert sugar. Neither titrated THAM nor mannitol change blood osmolality to a similar extent and it is the difference in osmolality between blood and CSF induced by urea which appears to be responsible for the CSF pressure reduction.<sup>14</sup> Furthermore, such a correction is even better maintained in the absence of urinary excretion.<sup>15</sup> As THAM is a potent diuretic, it may have a limited effect on the relief of intracranial hypertension associated with brain compression. It is noteworthy that even a very hypertonic solution such as urea-invert sugar (5.3 molar, 18 times the osmolality of the blood) did not completely correct the intracranial hypertension of hypercapnic acidosis, whereas an isosmolar solution of urea increased the hypertension and produced hematuria. This rise in intracranial pressure during urea-invert sugar infusion could not be accounted for by the fluid load. An expansion of extracellular space, as shown by Fishman,<sup>16</sup> is a contributing factor in the production of intracranial hypertension, but in this instance, after 20 minutes, urine output closely matched fluid input and fluid load was minimal. The partial correction of hypercapnic intracranial hypertension by agents which exert an osmotic activity could indicate that hypercapnic acidosis and its resulting cerebral vasodilation may also be accompanied by a transfer of water from vascular to cerebrospinal compartments, or possibly, from extracellular to intracellular

spaces. This hypothesis, however, requires further experimental testing.

These series of experiments indicate that the intracranial hypertension of hypercapnic acidosis cannot be corrected by agents which only have osmotic properties. Such a correction requires the restoration of acid-base balance either by THAM administration or hyperventilation.<sup>17</sup>

### Summary

Hypercapnic acidosis was produced in 17 dogs by maintaining them in apneic oxygenation for 30 minutes. There was a three to five-fold increase in cerebrospinal fluid (CSF) pressure, while arterial and CSF pH fell by 0.6 pH unit. During a second period of apneic oxygenation, one group of dogs received an infusion of 0.3 M tris(hydroxymethyl)amino-methane (THAM). CSF pressure did not change, marked diuresis was present, arterial and CSF pH remained within 0.1 pH unit of control while arterial and CSF  $P_{CO_2}$  rose respectively from 24 to 58 and 33 to 51 mm. of mercury. Two other groups of dogs were given 0.6 M mannitol or 0.3 M THAM titrated to pH 7.40 with HCl. In both instances diuresis was maintained and the increase in CSF pressure was half that of the control hypercapnic period, while blood and CSF pH and  $P_{CO_2}$  changes were the same. When 0.3 M urea was administered, the increase in CSF pressure was greater than in the control apneic period. Marked hematuria was present and blood pressure rose by an average of 30 mm. of mercury. When a 30 per cent solution of urea in 5 per cent dextrose (5.3 M) was administered CSF pressure rose from 33 to 100 mm. of water and blood pressure from 130 to 207 mm. of mercury pH and  $P_{CO_2}$  changes were similar to those recorded in the control apneic period. Marked diuresis was present. Intracranial hypertension of hypercapnic acidosis cannot be corrected by agents which have only osmotic properties. This correction requires a restoration of pH to normal which can be accomplished by hyperventilation or by THAM administration.

Presented at the Annual Meeting of the American Society of Anesthesiologists, New York, October 6, 1960. The investigation was supported (in part) by Public Health Research Grant H-4859, and a grant from the Abbott Laboratories.

Downloaded from http://ajsa2.silverchair.com/aneesthesiology/article-pdf/23/1/48/2808870000542-196201000-00008.pdf by guest on 17 April 2024

## References

1. Bronk, D. W., and Gesell, R.: Regulation of respiration. Effects of carbon dioxide, sodium bicarbonate and sodium carbonate on carotid and femoral flow of blood, *Amer. J. Physiol.* 82: 170, 1927.
2. Schmidt, C. F.: Influence of cerebral blood flow on respiration; Respiratory responses to changes in cerebral blood flow, *Amer. J. Physiol.* 84: 202, 1928.
3. Gibbs, F. A., Gibbs, E. L., and Lennox, W. G.: Changes in human cerebral blood flow consequent on alterations in blood gases, *Amer. J. Physiol.* 111: 557, 1935.
4. Kety, S. S., and Schmidt, C. F.: Effects of altered arterial tensions of carbon dioxide and oxygen on cerebral blood flow and cerebral oxygen consumption of normal young men, *J. Clin. Invest.* 27: 484, 1948.
5. Wolff, H. G., and Lennox, W. G.: Cerebral circulation; effect on pial vessels of variations in oxygen and carbon dioxide content of blood, *Arch. Neurol. Psychiat.* 23: 1097, 1930.
6. Lassen, N. A.: Cerebral blood flow and oxygen consumption in man, *Physiol. Rev.* 39: 183, 1959.
7. Draper, W. B., and Whitehead, R. W.: Phenomenon of diffusion respiration, *Anesth. Analg.* 28: 307, 1949.
8. Volhard, F.: Ueber künstliche Atmung durch Ventilation der Trachea und eine einfache Vorrichtung zur rhythmischen künstlichen Atmung, *Münch. med. Wschr.* 55: 209, 1908.
9. Goldensohn, E. S., Whitehead, R. W., Parry, T. M., Spencer, J. N., Grover, R. F., and Draper, W. B.: Studies on diffusion respiration; effect of diffusion respiration and high concentrations of CO<sub>2</sub> on cerebrospinal fluid pressure of anesthetized dogs, *Amer. J. Physiol.* 165: 334, 1951.
10. Small, H. S., Weitzner, S. W., and Nahas, G. G.: Cerebrospinal fluid pressures during hyperventilation and hypoxia in dogs, *Amer. J. Physiol.* 198: 704, 1960.
11. Holaday, D. A., and Verosky, M.: Improved micromanometric methods for analysis of respiratory gases in plasma and whole blood, *J. Lab. Clin. Med.* 47: 634, 1956.
12. Nahas, G. G.: Use of an organic carbon dioxide buffer in vivo, *Science* 129: 782, 1959.
13. Jordan, E. C., Slocum, H. C., and Nahas, G. G.: Effects of THAM on cerebrospinal fluid pressure during the acute carbon dioxide phase of apneic oxygenation, *ANESTHESIOLOGY* 21: 105, 1960.
14. Odom, D. D., Cecil, J. W., Hill, L. L., and Leachman, R. D.: Alterations in CSF and serum osmolality and electrolyte concentrations after intravenous urea administration, *Clin. Res.* 9: 18, 1961.
15. Javid, M., and Anderson, J.: Effect of urea on cerebrospinal fluid pressure in monkeys before and after bilateral nephrectomy, *J. Lab. Clin. Med.* 53: 484, 1959.
16. Fishman, R.: Effects of isotonic intravenous solutions on normal and increased intracranial pressure, *Arch. Neurol. Psychiat.* 70: 350, 1953.
17. Lundberg, N., Kjällquist, A., and Bien, C.: Reduction of increased intracranial pressure by hyperventilation. (Therapeutic aid in neurological surgery.) *Acta Psychiat. Scand.* 34: suppl. 139: 1, 1959.

**CEREBROSPINAL FLUID** The pH and P<sub>CO<sub>2</sub></sub> were studied in arterial blood and cerebrospinal fluid in normal subjects and in patients with respiratory insufficiency. With hyperventilation the alkalosis that resulted was more severe in arterial blood than in spinal fluid. Inhalation of 5 per cent carbon dioxide decreased pH in arterial blood more than in spinal fluid. Respiratory insufficiency produced a difference between arterial blood and cerebrospinal-fluid pH that was greater than normal despite a P<sub>CO<sub>2</sub></sub> difference that was less. (Meruarth, C. R., and others: *Acid-Base Relations Between Blood and Cerebrospinal Fluid in Normal Subjects and Patients with Respiratory Insufficiency*, *New Engl. J. Med.* 265: 310 (Aug. 17) 1961.)
